# Supplementary material
Source: PubMed Central journal article supplement (PMC5881887)

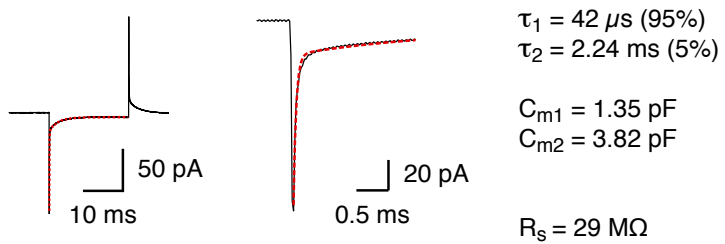

Supplementary Fig. 1

Supplement: NIHMS61006-supplement-Fig_S1.pdf [file NIHMS61006-supplement-Fig_S1.pdf]

MFB

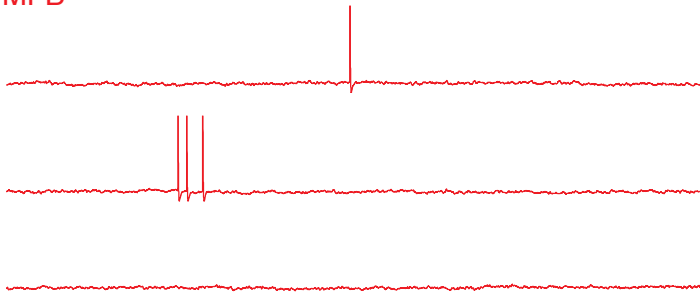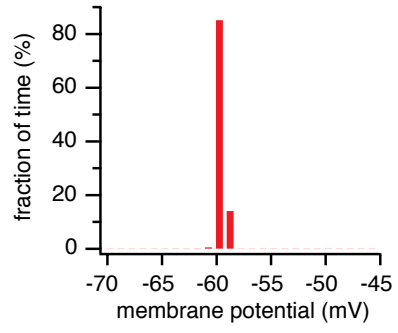

GC

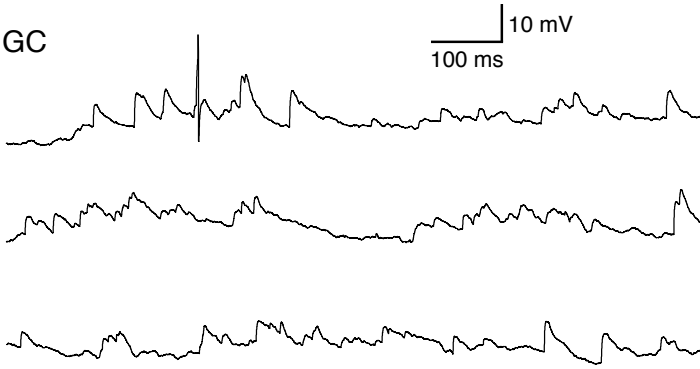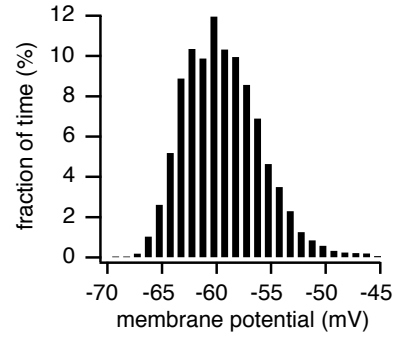

Supplementary Fig. 2

Supplement: NIHMS61006-supplement-Fig_S2.pdf [file NIHMS61006-supplement-Fig_S2.pdf]

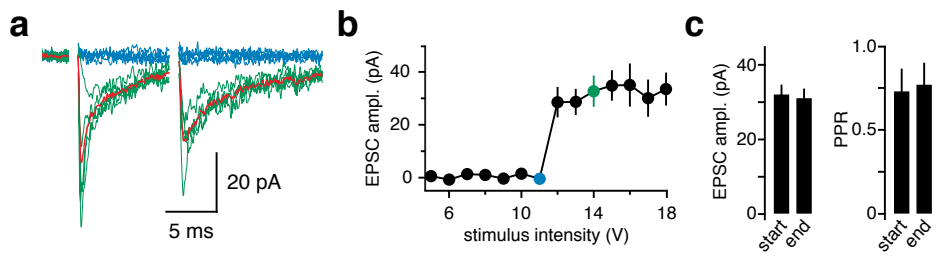

Supplementary Fig. 3

Supplement: NIHMS61006-supplement-Fig_S3.pdf [file NIHMS61006-supplement-Fig_S3.pdf]

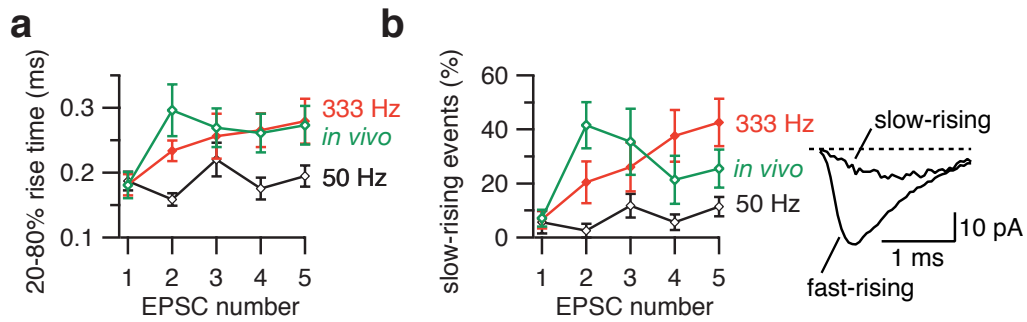

Supplementary Fig. 4

Supplement: NIHMS61006-supplement-Fig_S4.pdf [file NIHMS61006-supplement-Fig_S4.pdf]
